# Supplementary material for: Lipid microarrays identify key mediators of autoimmune brain inflammation
Source: Springer Nature journal article supplement (doi:10.1038/nm1344), 2005-12-11
Supplement: 41591_2006_BFnm1344_MOESM1_ESM.pdf [file 41591_2006_BFnm1344_MOESM1_ESM.pdf]

| Supplementary Table 1. Kanter <i>et al.</i>                          |                         |
|----------------------------------------------------------------------|-------------------------|
| LIPID                                                                | VENDOR                  |
| Disialoganglioside-GD1A                                              | Matreya                 |
| Disialoganglioside-GD1B                                              | Matreya                 |
| Disialoganglioside-GD2                                               | Biodesign International |
| Trisialoganglioside-GT1B                                             | Matreya                 |
| Cardiolipin                                                          | Sigma                   |
| Cholesterol                                                          | Sigma                   |
| Squalene                                                             | Sigma                   |
| Asialoganglioside-GM2                                                | Biodesign International |
| Brain phosphatidylinositol-4 phosphate                               | Avanti Polar lipids     |
| Brain polar lipid extract                                            | Avanti Polar lipids     |
| Brain sulfate                                                        | Avanti Polar lipids     |
| Brain total lipid extract                                            | Avanti Polar lipids     |
| Brain ceramides                                                      | Avanti Polar lipids     |
| Brain D-erythrospingosine                                            | Avanti Polar lipids     |
| Brain lysophosphatidylethanolamine                                   | Avanti Polar lipids     |
| Brain L- $\alpha$ -lysophosphatidylserine                            | Avanti Polar lipids     |
| Brain L- $\alpha$ -phosphatidylcholine                               | Avanti Polar lipids     |
| Brain L- $\alpha$ -phosphatidylserine                                | Avanti Polar lipids     |
| Brain L- $\alpha$ -phosphatidyl-ethanolamine                         | Avanti Polar lipids     |
| Brain sphingomyelin                                                  | Avanti Polar lipids     |
| Total cerebroside                                                    | Avanti Polar lipids     |
| Purified mixed gangliosides                                          | Matreya                 |
| Ganglioside-GM4                                                      | Calbiochem              |
| Lactosyl ceramide                                                    | Calbiochem              |
| Monosialoganglioside-GM1                                             | Matreya                 |
| Monosialoganglioside-GM2                                             | Matreya                 |
| Disialoganglioside-GD3                                               | Matreya                 |
| Tetrasialoganglioside-GQ1B                                           | Accurate Chemical       |
| Monosialoganglioside-GM3                                             | Matreya                 |
| Gangliotetraosyl ceramide asialo-GM1                                 | Matreya                 |
| Lipoteichoic acid from <i>S. aureus</i>                              | Sigma                   |
| Trehalose 6,6'-dimycolate from <i>M. tuberculosis</i>                | Sigma                   |
| LPS from <i>E. coli</i>                                              | Sigma                   |
| LPS from <i>P. aeruginosa</i>                                        | Sigma                   |
| Mycolic acid from <i>M. tuberculosis</i>                             | Sigma                   |
| Lipoteichoic acid from <i>B. subtilis</i>                            | Sigma                   |
| LPS from <i>S. typhimurium</i>                                       | Sigma                   |
| Lyso-GM1                                                             | Matreya                 |
| Fucosyl-GM1                                                          | Matreya                 |
| Lipoteichoic acid from <i>S. pyogenes</i>                            | Sigma                   |
| 1-Palmitoyl-2-Azelaoyl- <i>sn</i> -Glycero-3-Phosphocholine          | Avanti Polar Lipids     |
| 1-Palmitoyl-2- Glutaroyl- <i>sn</i> -Glycero-3-Phosphocholine        | Avanti Polar Lipids     |
| 1-Palmitoyl-2-(9'-oxo-Nonanoyl)- <i>sn</i> -Glycero-3-Phosphocholine | Avanti Polar Lipids     |
| 5 $\alpha$ -cholest-8(14)- <i>ene</i> -3 $\beta$ ,15 $\beta$ ,-diol  | Avanti Polar Lipids     |
| 3 $\beta$ -hydroxy-5 $\alpha$ -cholest-8(14)- <i>en</i> -15-one      | Avanti Polar Lipids     |
| 3 $\beta$ -hydroxy-5 $\alpha$ -cholestan-15-one                      | Avanti Polar Lipids     |
| 5 $\alpha$ -cholestane-3 $\beta$ ,15 $\alpha$ -diol                  | Avanti Polar Lipids     |
